# Supplementary material for: Targeted therapy‑associated cardiotoxicity in patients with stage‑IV lung cancer with or without cardiac comorbidities
Source: PubMed Central journal article supplement — Oncol Rep. 2024 Dec 18;53(2):25. doi: 10.3892/or.2024.8858 (PMC11683451; doi:10.3892/or.2024.8858), 2024-12-18
Supplement: Supplementary_Data.pdf [file Supplementary_Data.pdf]

Table SI. Comorbidity and cardiotoxicity of patients treated with *EGFR* inhibitors, *ALK/ROS1* inhibitors and anti-*VEGF* therapy.

| Variable                          | Comorbidity group |          |         |                    | P-value |
|-----------------------------------|-------------------|----------|---------|--------------------|---------|
|                                   | None              | Cardiac  | Other   | Total <sup>a</sup> |         |
| <i>EGFR</i> inhibitors, n (%)     |                   |          |         |                    |         |
| Overall                           |                   |          |         |                    | 0.054   |
| Comorbidity                       | 40                | 88       | 346     | 474                |         |
| Cardiotoxicity                    | 0                 | 3 (3.4)  | 2 (0.6) | 5 (1.1)            |         |
| Osimertinib                       |                   |          |         |                    |         |
| Comorbidity                       | 11                | 32       | 121     | 164                | 0.018   |
| Cardiotoxicity                    | 0                 | 3 (9.4)  | 1 (0.8) | 4 (2.4)            |         |
| <i>ALK/ROS1</i> inhibitors, n (%) |                   |          |         |                    |         |
| Comorbidity                       | 7                 | 19       | 48      | 74                 | 0.001   |
| Cardiotoxicity                    | 0                 | 6 (30.0) | 1 (2.1) | 7 (9.5)            |         |
| Anti- <i>VEGF</i> therapy, n (%)  |                   |          |         |                    |         |
| Overall                           |                   |          |         |                    | 0.614   |
| Comorbidity                       | 27                | 39       | 185     | 251                |         |
| Cardiotoxicity                    | 0                 | 1 (2.6)  | 2 (1.1) | 3 (1.2)            |         |
| Bevacizumab                       |                   |          |         |                    |         |
| Comorbidity                       | 26                | 37       | 170     | 233                | 0.397   |
| Cardiotoxicity                    | 0                 | 1 (2.7)  | 1 (0.6) | 2 (0.9)            |         |
| Other targeted drugs only, n      |                   |          |         |                    |         |
| Comorbidity                       | 1                 | 1        | 4       | 6                  | -       |
| Cardiotoxicity                    | 0                 | 0        | 0       | 0                  |         |

<sup>a</sup>The sum of the numbers was more than the total number of enrolled patients as 329 of 701 the patients received >1 targeted drug.  $\chi^2$  test and Fisher's exact test were used for statistical analysis. ALK, anaplastic lymphoma kinase; EGFR, epidermal growth factor receptor; ROS1, c-ros oncogene 1; VEGFR, vascular endothelial growth factor receptor.
